# Supplementary material for: Age-Dependent Accumulation of 8-Oxoguanine in the DNA and RNA in Various Rat Tissues
Source: Hindawi journal article supplement (doi:10.1155/2013/303181), 2013-01-01

Supplementary Table 1. Gradient of the mobile phase for each kind of samples

| Samples | Different ratio of elution A and B in gradient (%) |              |             |
|---------|----------------------------------------------------|--------------|-------------|
|         | A: 95, B: 5                                        | A: 50, B: 50 | A: 95, B: 5 |
| DNA     | 0-3 min                                            | 3.01-4 min   | 4.01-13 min |
| RNA     | 0-3 min                                            | 3.01-4 min   | 4.01-13 min |
| Urine   | 0-2 min                                            | 2.01-3 min   | 3.01-13 min |
| Plasma  | 0-2 min                                            | 2.01-3 min   | 3.01-13 min |

Supplementary Table 2. Conditions for individual compound

| Compound  | MRM pairs   | Internal Standard MRM pairs | DP  | CE | CXP | EP |
|-----------|-------------|-----------------------------|-----|----|-----|----|
| 8-oxodGsn | 284.1/168.1 | 289.1/173.1                 | 50  | 17 | 13  | 10 |
| dGsn      | 268.1/152.1 | 273.1/157.1                 | 180 | 47 | 14  | 10 |
| 8-oxoGsn  | 300.1/168.1 | 303.1/171.1                 | 50  | 25 | 7   | 10 |
| Gsn       | 284.1/152.1 | 289.1/157.1                 | 250 | 35 | 12  | 10 |

Supplementary Fig. 1. HPLC chromatograms of creatinine standard (A) and urine sample (B)

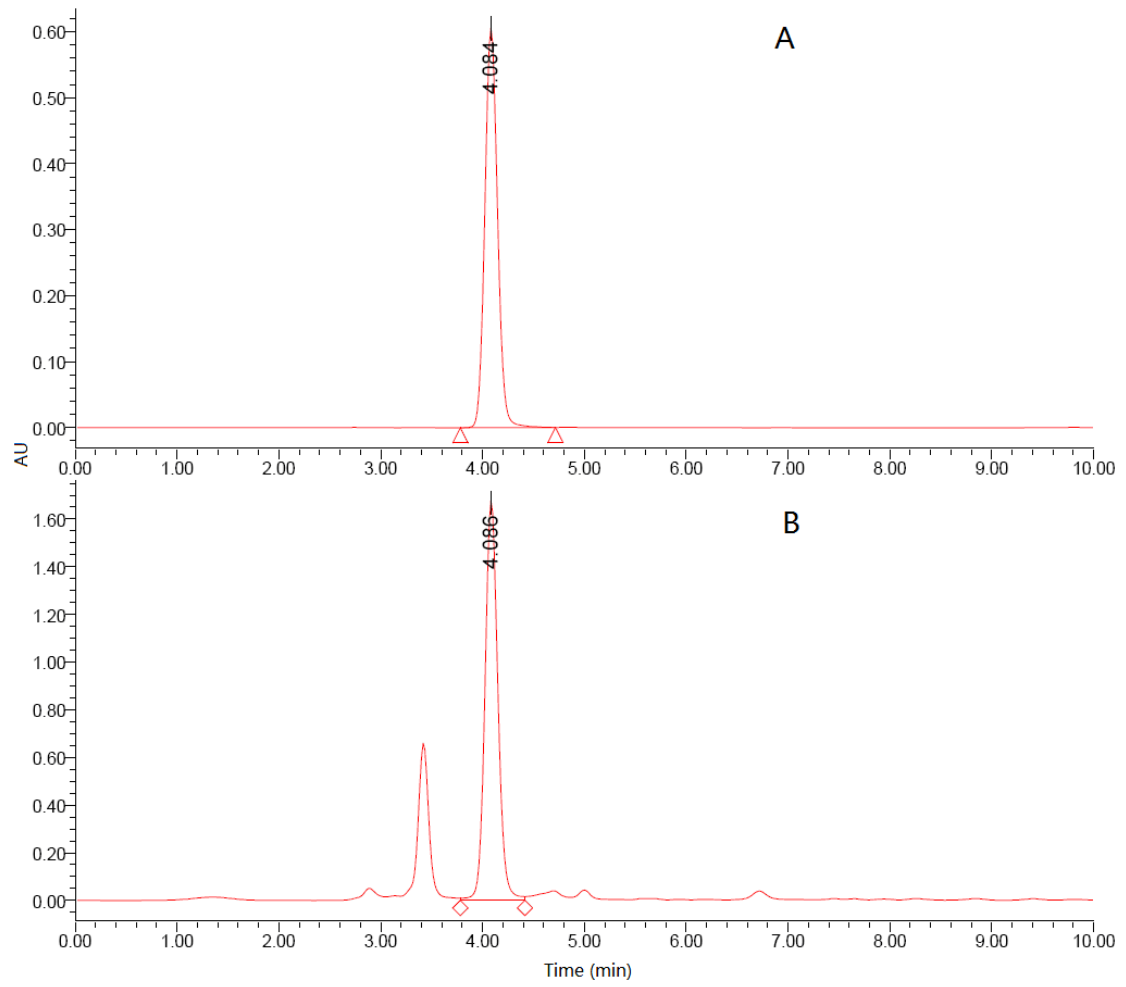

Supplement: f1 [file 303181.f1.pdf]
